# Supplementary material for: Hybrid-hybrid correction of errors in long reads with HERO
Source: PubMed Central journal article supplement (PMC10690975; doi:10.1186/s13059-023-03112-7), 2023-12-01
Supplement: 13059_2023_3112_MOESM1_ESM.pdf [file 13059_2023_3112_MOESM1_ESM.pdf]

# Supplementary Material

## Hybrid-hybrid correction of errors in long reads with HERO

Xiongbin Kang<sup>1, 2</sup>, Jialu Xu<sup>1</sup>, Xiao Luo<sup>1,2,\*</sup>, Alexander Schönhuth<sup>2,\*</sup>

<sup>1</sup> College of Biology, Hunan University, Changsha, China

<sup>2</sup> Genome Data Science, Faculty of Technology, Bielefeld University, Bielefeld, Germany

\*To whom correspondence should be addressed.

## Supplementary Methods

Commands and versions of tools used for comparison.

Ratatosk 0.7.6

```
Ratatosk correct -s short_reads.fastq -l long_reads.fastq -o output_file
```

FMLRC2 0.1.8

```
cat short_reads.fastq | awk 'NR % 4 == 2' | sort | tr NT TN | ropebwt2 -LR | tr NT TN |  
fmlrc2-convert comp_msbwt.npy  
fmlrc2 comp_msbwt.npy long_reads.fastq output_file
```

LoRDEC v0.9

```
lordec-correct -k 21 -s 5 -2 short_reads.fastq -i long_reads.fastq -o output_file
```

Canu v2.1.1

Assemble metagenomic sequencing data

```
canu genomeSize=genomesize -nanopore raw_long_read  
canu genomeSize=genomesize -pacbio raw_long_read  
canu genomeSize=genomesize -pacbio-hifi corrected_long_read
```

Hifiasm\_meta v0.13-r308

```
hifiasm_meta -o output_file corrected_long_read
```

Assemble diploid/polyploid sequencing data

Arabidopsis thaliana

```
canu -assemble genomeSize=genomesize -corrected -pacbio corrected_long_read
```

Others diploid/polyploid sequencing data

```
canu -assemble genomeSize=genomesize stopOnLowCoverage=3 minInputCoverage=3 -corrected  
-nanopore corrected_long_read
```

```
canu -assemble genomeSize=genomesize stopOnLowCoverage=3 minInputCoverage=3 -corrected  
-pacbio corrected_long_read
```

BFC vr181

```
bfc -s genomesize short_reads.fastq >corrected_short_reads.fastq
```

Fastp v0.19.11

```
fastp -i long_reads.fastq -Q -l 1000 -o filter_long_reads.fastq
```

**Table S1.** GenBank numbers of reference genomes, and sample information and assembly results of real gut metagenome sequencing data.

| Additional file 1: Table S1.xlsx |

| Methods  | CPU Time (h) | Peak Memory Usage (GB) |
|----------|--------------|------------------------|
| FMLRC    | <b>0.29</b>  | <b>0.35</b>            |
| HERO     | 1.54         | 1.00                   |
| Ratatosk | 1.79         | 0.51                   |
| LoRDEC   | 2.40         | 1.84                   |

**Table S2.** Runtime and memory usage for correcting simulated PacBio CLR reads of 3 *Salmonella* strains. The coverage of short and long reads both is 10X

| Genomes                                                | GenBank no | Coverage | ANI (%) |
|--------------------------------------------------------|------------|----------|---------|
| Streptococcus_thermophilus_isolate_NWC_1_1             | CP029252.1 | 56.29    | 99.99   |
| Streptococcus_thermophilus_isolate_NWC_2_1             | CP031021.1 | 55.07    |         |
| Lactobacillus_delbrueckii_subsp_lactis_isolate_NWC_1_2 | CP029250.1 | 39.38    | 99.24   |
| Lactobacillus_delbrueckii_subsp_lactis_isolate_NWC_2_2 | CP031023.1 | 35.13    |         |
| Lactobacillus_helveticus_isolate_NWC_2_4               | CP031018.1 | 17.59    | 98.03   |
| Lactobacillus_helveticus_isolate_NWC_2_3               | CP031016.1 | 10.27    |         |

**Table S3.** Average nucleotide identity (ANI) and coverage of Illumina reads for the 6 strains in the NWC data set.

| Correction      | Indels/100 kbp | Mismatches/100 kbp | GF(%)  | MC(%) | N/100 kbp |
|-----------------|----------------|--------------------|--------|-------|-----------|
| Bmock12 ONT     |                |                    |        |       |           |
| 3Ratatosk       | 35.41          | 58.15              | 93.75  | 2.58  | 0.99      |
| 3Ratatosk_Racon | 11.79          | 169.42             | 93.77  | 2.60  | 0.04      |
| 3Ratatosk_HERO  | <b>9.80</b>    | <b>42.50</b>       | 93.77  | 2.58  | 0.24      |
| Bmock12 PacBio  |                |                    |        |       |           |
| 3Ratatosk       | 369.30         | 139.52             | 91.71  | 10.38 | 1.66      |
| 3Ratatosk_Racon | 285.39         | 243.38             | 92.04  | 10.96 | 0.12      |
| 3Ratatosk_HERO  | <b>197.70</b>  | <b>98.12</b>       | 92.01  | 11.43 | 0.28      |
| NWCs ONT        |                |                    |        |       |           |
| 3Ratatosk       | 489.02         | 621.13             | 99.99  | 7.06  | 26.14     |
| 3Ratatosk_Racon | 288.95         | 548.67             | 100.00 | 7.23  | 7.94      |
| 3Ratatosk_HERO  | <b>245.68</b>  | <b>457.34</b>      | 100.00 | 7.37  | 14.56     |
| NWCs PacBio     |                |                    |        |       |           |
| 3Ratatosk       | 360.58         | 422.17             | 83.12  | 6.12  | 13.65     |
| 3Ratatosk_Racon | 335.37         | 409.34             | 83.65  | 5.82  | 5.05      |
| 3Ratatosk_HERO  | <b>276.42</b>  | <b>365.52</b>      | 84.22  | 5.73  | 9.93      |

**Table S4.** Here we compare the correction effects of different overlap-graph corrections. The first row in each subtable shows the error rates after 3 rounds of correction using Ratatosk. The second row in each subtable represents the error rates after 3 rounds of Ratatosk correction followed by one round of Racon correction. The third row in each subtable shows the error rates after 3 rounds of Ratatosk correction and one round of HERO correction.

| Assembly       | GF(%) | Indels/100 kbp | Mismatches/100 kbp | NGA50 | N/100 kbp | MC(%) |
|----------------|-------|----------------|--------------------|-------|-----------|-------|
| Bmock12 ONT    |       |                |                    |       |           |       |
| Canu           | 57.13 | 504.95         | 140.75             | 78498 | 0.00      | 9.04  |
| Canu_Racon     | 57.15 | 8.29           | <b>145.97</b>      | 78498 | 0.02      | 9.04  |
| Canu_HERO      | 57.46 | 11.79          | 73.22              | 78498 | 0.04      | 9.04  |
| Bmock12 PacBio |       |                |                    |       |           |       |
| Canu           | 50.01 | 174.71         | 63.79              | 6025  | 0.00      | 3.72  |
| Canu_Racon     | 50.01 | 4.32           | <b>104.21</b>      | 6025  | 0.00      | 3.72  |
| Canu_HERO      | 50.01 | 4.30           | 54.53              | 6025  | 0.01      | 3.72  |
| NWC PacBio     |       |                |                    |       |           |       |
| Canu           | 44.27 | 62.25          | 33.51              | —     | 0.00      | 36.51 |
| Canu_Racon     | 44.32 | 25.32          | <b>92.91</b>       | —     | 0.00      | 36.51 |
| Canu_HERO      | 44.24 | 27.46          | 34.27              | —     | 0.00      | 36.51 |

**Table S5.** Assemble raw reads into contigs using Canu (first line), then polish the contigs respectively using Racon (second line) and HERO (third line). The table above shows the error rates of the unpolished contigs evaluated by QUAST, as well as the error rates of the contigs polished by Racon and HERO respectively. Indels/100 kbp: average number of insertion or deletion errors per 100,000 aligned bases. Mismatches/100 kbp = average number of mismatch errors per 100,000 aligned bases. Genome Fraction GF reflects how much of each of the strain-specific genomes is covered by the corrected reads. NGA50 is the length of the longest contig such that the alignments of that and all longer contigs span at least 50% of the reference sequence. N/100 kbp denotes the average number of uncalled bases (N's) per 100,000 bases in the read. MC = fraction of misassembled contigs.

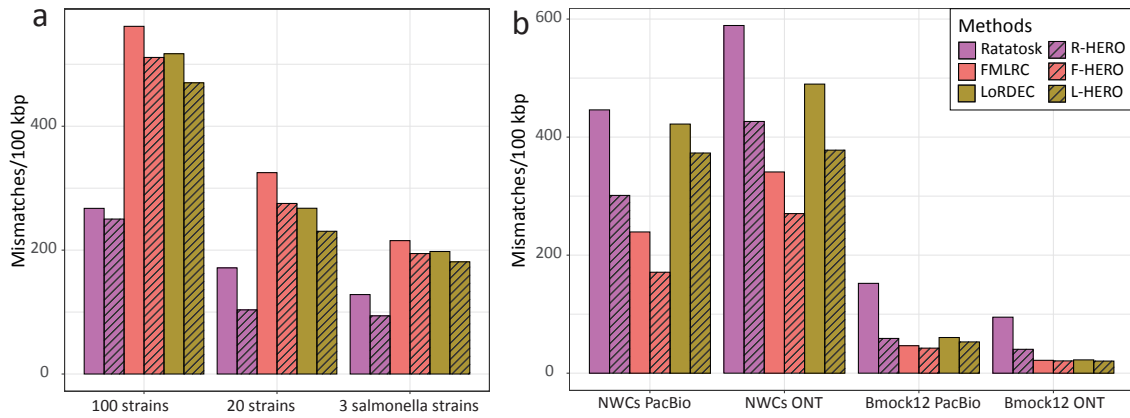

**Figure S1.** Mismatch error rates (y-axis) for simulated (a) and real data sets (b). The x-axis refers to different data sets and different protocols (different colors and patterns of bars). Ratatosk, FMLRC and LoRDEC refer to 8 iterations of the respective methods (pointed out as optimal protocol earlier); R-, F- and L-HERO refer to 3 iterations of Ratatosk, FMLRC and LoRDEC, respectively, followed by 5 iterations of HERO-OG.

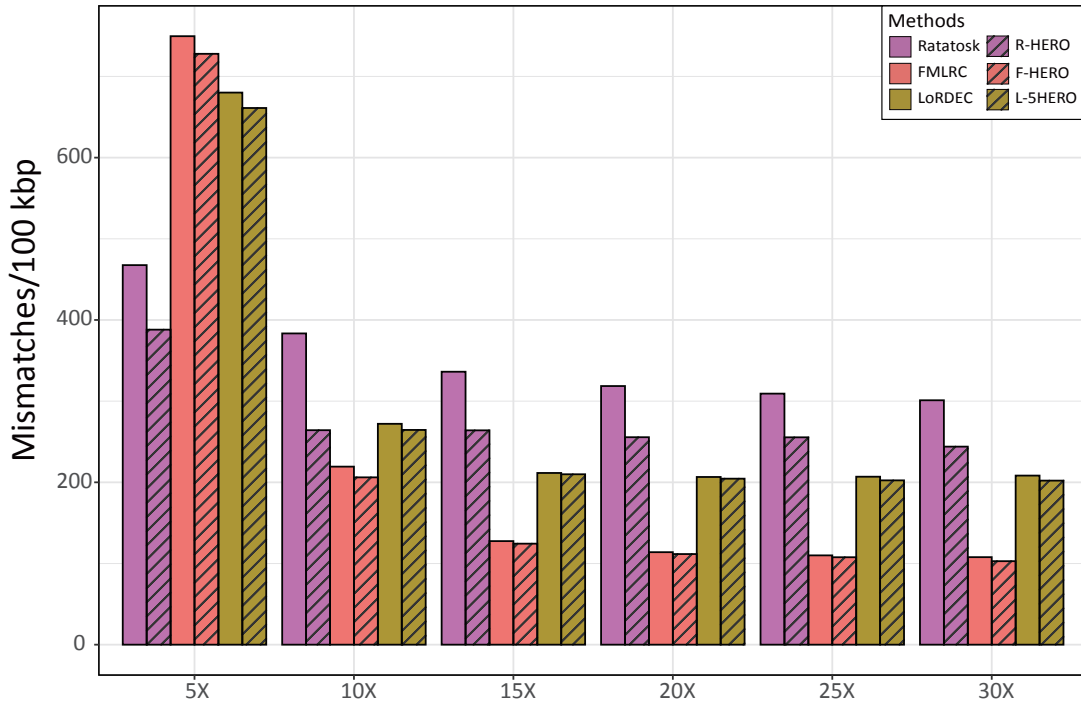

**Figure S2.** Mismatch error rates (y-axis) for spike-in datasets relative to different coverages (x-axis). Reads are from PacBio CLR. Different correction protocols are indicated by different colors and patterns of bars.

| Strain ID                                        | Coverage | Ratatosk | R-HERO | FMLRC   | F-HERO | LoRDEC  | L-HERO  |
|--------------------------------------------------|----------|----------|--------|---------|--------|---------|---------|
| NWCs PacBio indel error rate (per 100 kbp)       |          |          |        |         |        |         |         |
| CP029252.1                                       | 56.29X   | 135.47   | 61.90  | 111.87  | 38.08  | 38.09   | 28.25   |
| CP031021.1                                       | 55.07X   | 140.38   | 65.21  | 107.32  | 39.02  | 39.55   | 29.89   |
| CP029250.1                                       | 39.38X   | 315.90   | 207.91 | 270.4   | 133.89 | 69.6    | 45.59   |
| CP031023.1                                       | 35.13X   | 525.85   | 344.70 | 316.34  | 174.11 | 88.35   | 53.18   |
| CP031018.1                                       | 17.59X   | 1863.98  | 311.91 | 735.16  | 345.42 | 467.67  | 144.21  |
| CP031016.1                                       | 10.27X   | 1241.70  | 601.76 | 720.18  | 386.42 | 361.26  | 208.04  |
| NWCs PacBio mismatch error rate (per 100 kbp)    |          |          |        |         |        |         |         |
| CP029252.1                                       | 56.29X   | 129.67   | 85.86  | 80.78   | 41.31  | 146.83  | 129.00  |
| CP031021.1                                       | 55.07X   | 139.12   | 94.56  | 85.89   | 50.14  | 161.33  | 143.43  |
| CP029250.1                                       | 39.38X   | 340.70   | 266.84 | 200.70  | 141.96 | 353.30  | 292.81  |
| CP031023.1                                       | 35.13X   | 609.09   | 507.34 | 298.45  | 242.30 | 489.01  | 447.12  |
| CP031018.1                                       | 17.59X   | 2426.42  | 861.82 | 1686.14 | 990.91 | 2579.72 | 1025.03 |
| CP031016.1                                       | 10.27X   | 1161.46  | 759.92 | 976.18  | 695.89 | 1013.44 | 806.4   |
| Bmock12 PacBio indel error rate (per 100 kbp)    |          |          |        |         |        |         |         |
| 2615840527                                       | 618.76X  | 307.58   | 39.63  | 9.74    | 5.62   | 24.77   | 11.70   |
| 2623620618                                       | 579.87X  | 302.67   | 54.44  | 28.51   | 17.96  | 33.36   | 15.92   |
| 2623620617                                       | 507.08X  | 335.53   | 64.08  | 32.57   | 18.45  | 36.27   | 18.41   |
| 2615840697                                       | 447.83X  | 319.17   | 51.73  | 19.65   | 12.18  | 33.09   | 16.28   |
| 2617270709                                       | 425.47X  | 366.38   | 47.86  | 14.85   | 8.81   | 38.32   | 19.26   |
| 2615840601                                       | 170.59X  | 368.56   | 87.83  | 29.66   | 20.63  | 26.84   | 14.58   |
| 2616644829                                       | 135.05X  | 326.39   | 75.08  | 23.59   | 16.98  | 38.77   | 19.23   |
| 2615840533                                       | 78.32X   | 288.00   | 37.19  | 51.49   | 39.82  | 38.19   | 16.61   |
| 2615840646                                       | 31.90X   | 392.87   | 46.28  | 129.88  | 100.46 | 173.40  | 55.15   |
| 2623620567                                       | 18.19X   | 558.84   | 93.40  | 216.20  | 173.68 | 182.99  | 57.48   |
| 2623620557                                       | 14.91X   | 648.11   | 146.43 | 203.76  | 167.54 | 231.07  | 64.72   |
| Bmock12 PacBio mismatch error rate (per 100 kbp) |          |          |        |         |        |         |         |
| 2615840527                                       | 618.76X  | 97.97    | 15.67  | 7.61    | 6.32   | 14.54   | 11.13   |
| 2623620618                                       | 579.87X  | 207.90   | 107.03 | 60.92   | 58.18  | 79.66   | 76.71   |
| 2623620617                                       | 507.08X  | 216.57   | 108.61 | 87.81   | 83.38  | 85.49   | 79.13   |
| 2615840697                                       | 447.83X  | 135.68   | 41.05  | 37.95   | 34.49  | 67.06   | 59.67   |
| 2617270709                                       | 425.47X  | 117.16   | 29.52  | 17.99   | 16.28  | 39.74   | 30.05   |
| 2615840601                                       | 170.59X  | 117.00   | 40.43  | 24.15   | 21.94  | 20.03   | 20.10   |
| 2616644829                                       | 135.05X  | 167.61   | 84.43  | 59.20   | 58.27  | 74.14   | 72.09   |
| 2615840533                                       | 78.32X   | 95.66    | 17.57  | 51.36   | 45.52  | 24.80   | 19.79   |
| 2615840646                                       | 31.90X   | 123.86   | 22.50  | 117.03  | 99.49  | 131.15  | 96.56   |
| 2623620567                                       | 18.19X   | 281.03   | 98.04  | 308.89  | 301.86 | 268.87  | 218.36  |
| 2623620557                                       | 14.91X   | 328.49   | 143.96 | 330.53  | 325.88 | 267.24  | 180.00  |

**Figure S3.** Mismatch error rates for different methods stratified by the strains of the real data sets (1st column: NWC = Genbank ID, Bmock12 = IMG Taxon ID), which are ordered in descending order by their coverages (2nd column). Error rates are colored from large (red) via medium (white) to low (blue). The evident trend are improvements in indel error rate relative to increasing coverage.

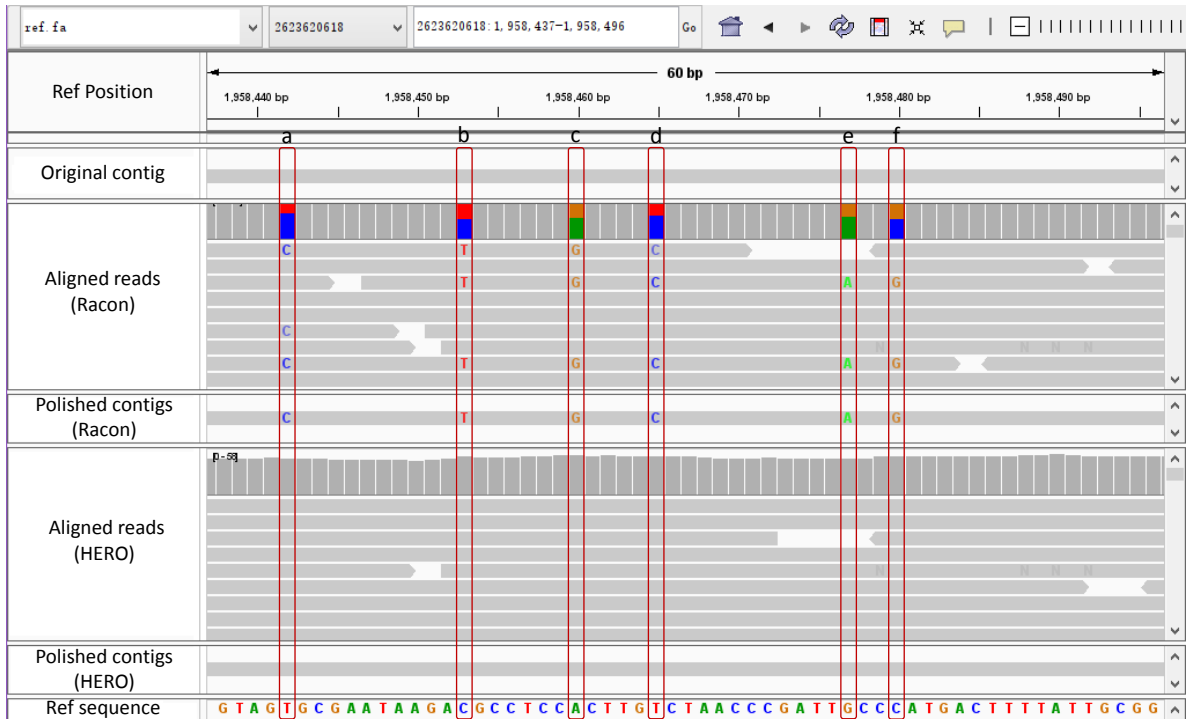

**Figure S4.** Taking Bmock12 PacBio data as an example to briefly describe over correction. Both Racon and HERO adopt the strategy of aligning reads to contigs. Here we can see that in Racon's alignment file, some reads have different bases compared to the original contigs. For example, at position a, most bases are C in Racon's alignment file but quite a few reads are T, which is the same as the original contigs. In HERO's alignment file, at position a, since there are more than 5 reads having the same base T as the original contigs, the C bases are considered as reads from other strains. HERO then disentangles the overlaps leaving only reads with T. They subsequently polish the contigs based on the alignment files. We can see Racon's polished contigs incorporated many bases different from the original contigs, such as at positions a, b, c, d, e, f. In contrast, HERO's polished contigs did not introduce any new mutations.
